# Supplementary material for: Prognostic Impact of LAG-3 mRNA Expression in Early Breast Cancer
Source: MDPI journal article supplement (doi:10.3390/biomedicines10102656), 2022-10-21
Supplement: s1 [file s1]

p=0.664  
Log Rank

# Kaplan–Meier survival estimates whole cohort

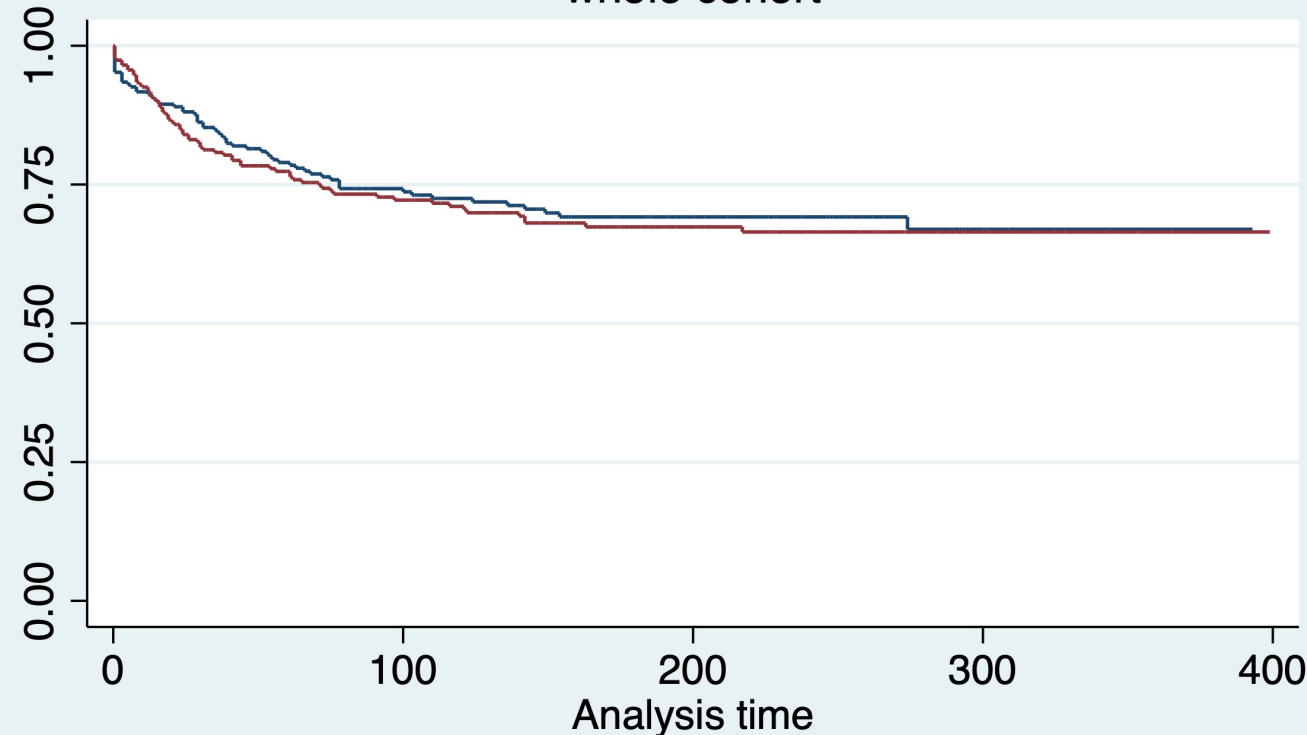

| Number at risk |            |                                                             |     |    |    |   |
|----------------|------------|-------------------------------------------------------------|-----|----|----|---|
| {              | CTLA-4 = 0 | 230                                                         | 128 | 72 | 19 | 0 |
|                | CTLA-4 = 1 | 231                                                         | 132 | 79 | 22 | 0 |
|                |            | <div>— CTLA-4 low expression — CTLA-4 high expression</div> |     |    |    |   |
