# Supplementary material for: Prognostic Impact of LAG-3 mRNA Expression in Early Breast Cancer
Source: MDPI journal article supplement (doi:10.3390/biomedicines10102656), 2022-10-21
Supplement: s1 [file s1]

# Kaplan–Meier survival estimates

whole cohort

p=0.361  
Log Rank

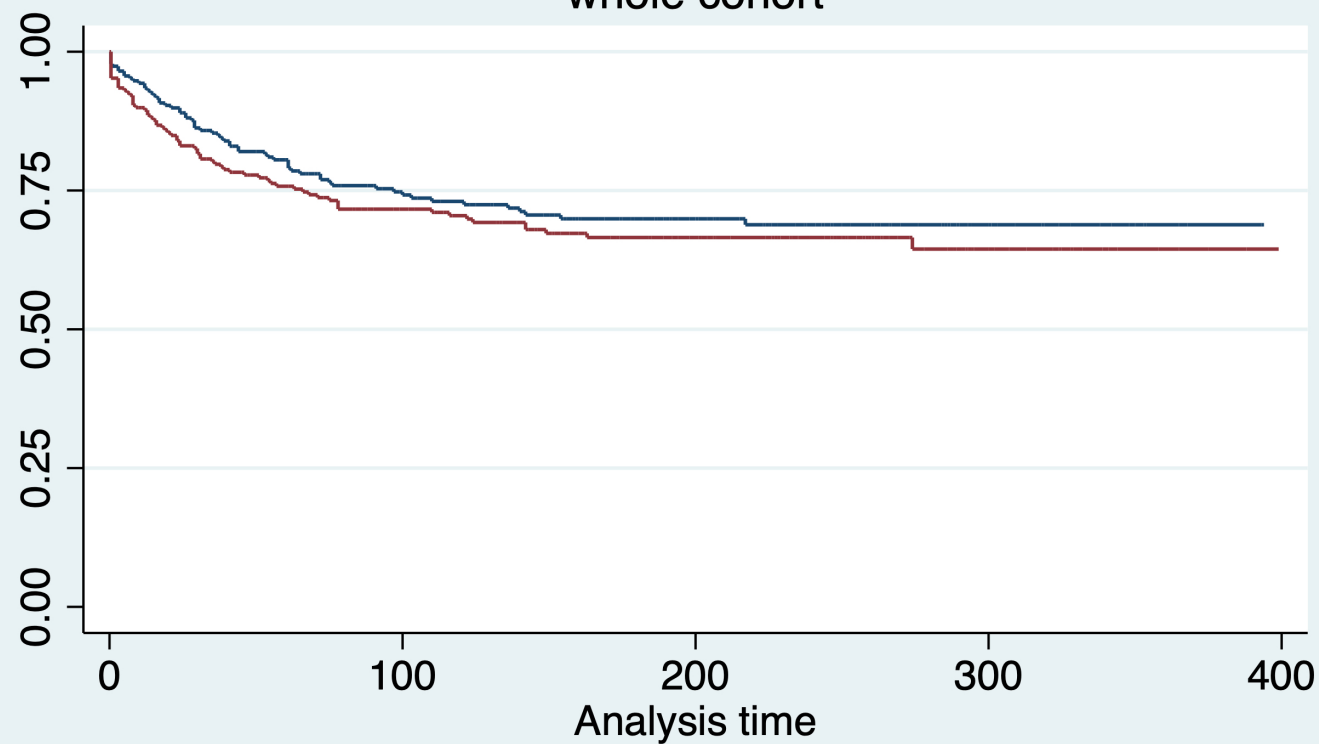

Number at risk

|          |     |     |    |    |   |
|----------|-----|-----|----|----|---|
| PD-1 = 0 | 230 | 132 | 74 | 20 | 0 |
| PD-1 = 1 | 231 | 128 | 77 | 21 | 0 |

— PD-1 expression low — PD-1 expression high
