# Supplementary material for: Prognostic Impact of LAG-3 mRNA Expression in Early Breast Cancer
Source: MDPI journal article supplement (doi:10.3390/biomedicines10102656), 2022-10-21
Supplement: s1 [file s1]

p=0.856

### Kaplan–Meier survival estimates

Luminal A like

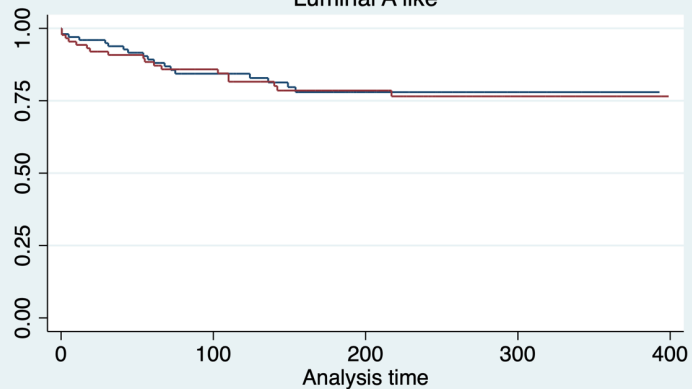

Number at risk

|       |     |    |    |    |   |
|-------|-----|----|----|----|---|
| CD8=0 | 101 | 62 | 30 | 10 | 0 |
| CD8=1 | 88  | 61 | 42 | 12 | 0 |

— CD8 expression low — CD8 expression high

p=0.634

### Kaplan–Meier survival estimates

Luminal B like

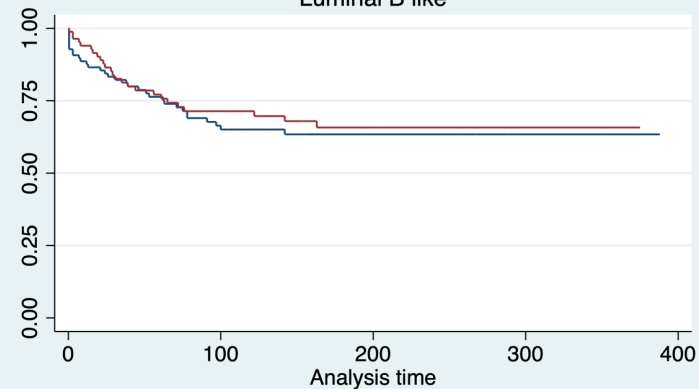

Number at risk

|       |    |    |    |   |   |
|-------|----|----|----|---|---|
| CD8=0 | 97 | 50 | 24 | 5 | 0 |
| CD8=1 | 85 | 46 | 25 | 7 | 0 |

— CD8 expression low — CD8 expression high

p=0.326

### Kaplan–Meier survival estimates

HER2 positive

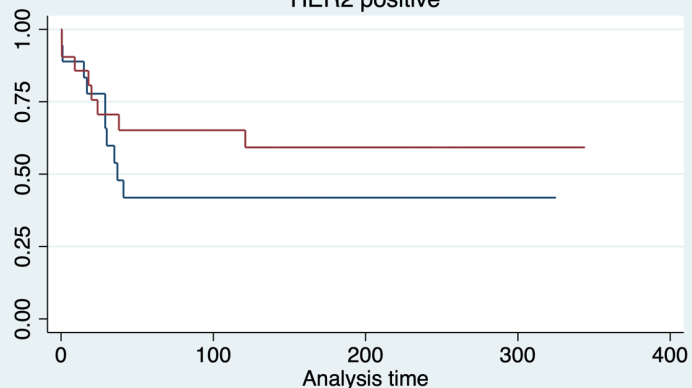

Number at risk

|       |    |    |   |   |   |
|-------|----|----|---|---|---|
| CD8=0 | 18 | 5  | 3 | 1 | 0 |
| CD8=1 | 21 | 11 | 9 | 2 | 0 |

— CD8 expression low — CD8 expression high

p=0.208

### Kaplan–Meier survival estimates

basal like

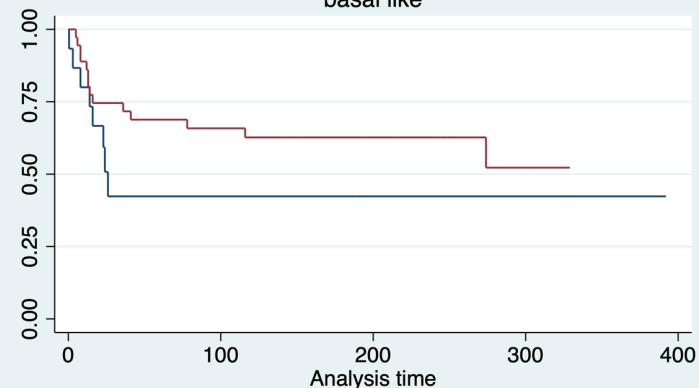

Number at risk

|       |    |    |    |   |   |
|-------|----|----|----|---|---|
| CD8=0 | 15 | 4  | 2  | 2 | 0 |
| CD8=1 | 36 | 21 | 16 | 2 | 0 |

— CD8 expression low — CD8 expression high
