# Supplementary material for: Prognostic Impact of LAG-3 mRNA Expression in Early Breast Cancer
Source: MDPI journal article supplement (doi:10.3390/biomedicines10102656), 2022-10-21
Supplement: s1 [file s1]

# Kaplan–Meier survival estimates

whole cohort

p=0.561  
Log Rank

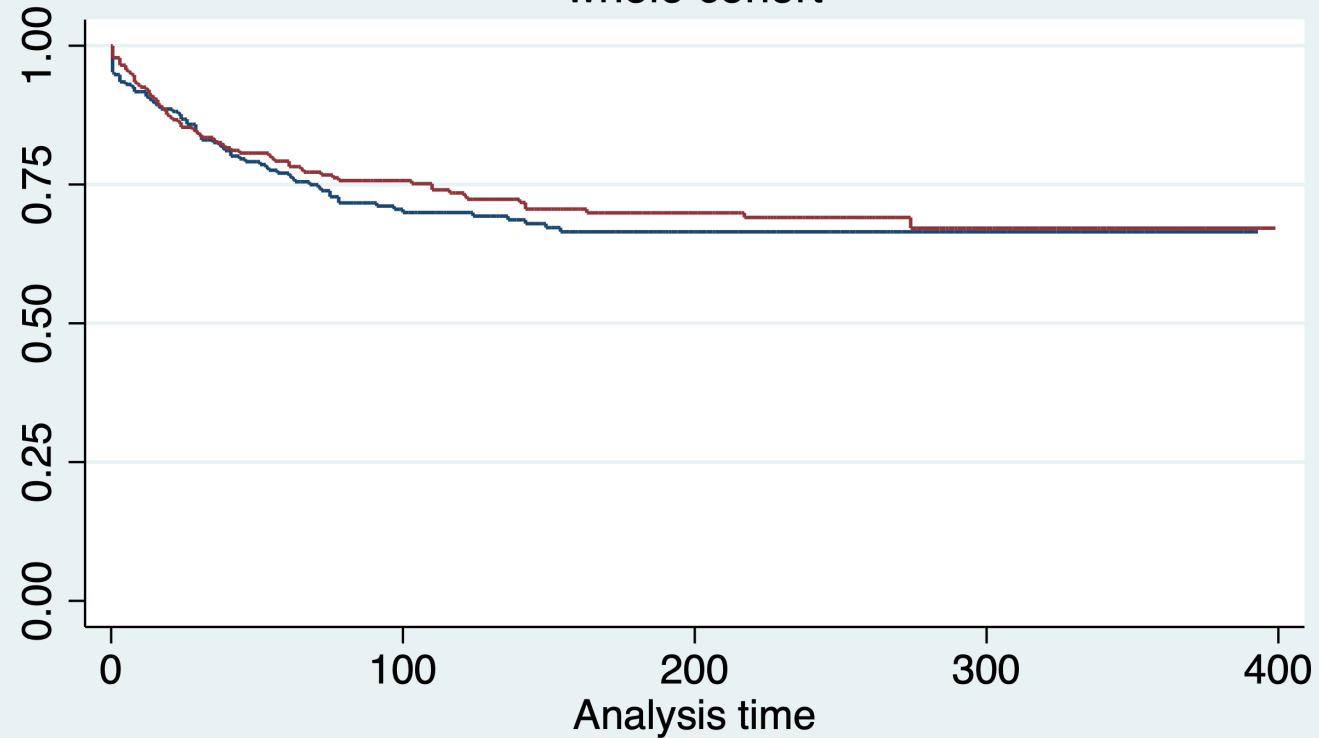

Number at risk

|         |     |     |    |    |   |
|---------|-----|-----|----|----|---|
| CD8 = 0 | 231 | 121 | 59 | 18 | 0 |
| CD8 = 1 | 230 | 139 | 92 | 23 | 0 |

— CD8 low expression — CD8 high expression
