# Supplementary material for: Prognostic Impact of LAG-3 mRNA Expression in Early Breast Cancer
Source: MDPI journal article supplement (doi:10.3390/biomedicines10102656), 2022-10-21
Supplement: s1 [file s1]

| univariat |                         | HR    | 95% CI<br>lower | upper | p- value |
|-----------|-------------------------|-------|-----------------|-------|----------|
| CTLA-4    | High vs. Low expression | 1.078 | 0.767           | 1.515 | 0.666    |

| multivariat       |                | HR    | 95% CI<br>lower | upper | p- value     |
|-------------------|----------------|-------|-----------------|-------|--------------|
| CTLA-4            | High vs. Low   | 0.849 | 0.553           | 1.302 | 0.453        |
| Age               | <50 vs. ≥50    | 1.142 | 0.659           | 1.978 | 0.636        |
| Tumor size        | T2-4 vs. T1    | 1.558 | 0.978           | 2.483 | 0.062        |
| Lymph node status | N1,2,3 vs. N0  | 1.406 | 0.908           | 2.176 | 0.126        |
| Grade             | GIII vs. GI/II | 2.188 | 1.385           | 3.458 | <u>0.001</u> |
| Ki 67             | >20% vs. <20%  | 1.352 | 0.854           | 2.139 | 0.198        |
