# Supplementary material for: Prognostic Impact of LAG-3 mRNA Expression in Early Breast Cancer
Source: Biomedicines. 2022 Oct 21;10(10):2656. doi: 10.3390/biomedicines10102656 (PMC9599264; doi:10.3390/biomedicines10102656)
Supplement: Supplementary file 1 [file biomedicines-10-02656-s001.zip]

Archive with 13 entries (13 files):
- Figure S1.pdf
- Figure S2a.pdf
- Figure S2b.pdf
- Figure S3a.pdf
- Figure S3b.pdf
- Figure S4a.pdf
- Figure S4b.pdf
- Figure S5.pdf
- Figure S6a.pdf
- Figure S6b.pdf
- Figure S7a.pdf
- Figure S7b.pdf
- Table S1.pdf
